# Supplementary material for: Band engineering in Mg3Sb2 by alloying with Mg3Bi2 for enhanced thermoelectric performance
Source: Royal Society of Chemistry journal article supplement (doi:10.1039/c7mh00865a), 2017-11-20
Supplement: c7mh00865a1.pdf [file c7mh00865a1.pdf]

## Electronic Supplementary Information

### Band engineering in $\text{Mg}_3\text{Sb}_2$ by alloying with $\text{Mg}_3\text{Bi}_2$ for enhanced thermoelectric performance

Kazuki Imasato<sup>1</sup>, Stephen Dongmin Kang<sup>1,2</sup>, Saneyuki Ohno<sup>1,2</sup> and G. Jeffrey Snyder<sup>†1</sup>

<sup>1</sup>*Department of Materials Science and Engineering, Northwestern University, IL 60208, USA*

<sup>2</sup>*Department of Applied Physics and Materials Science, California Institute of Technology, CA 91125, USA*

<sup>†</sup>jeff.snyder@northwestern.edu

#### Lattice parameter shift in the $\text{Mg}_3\text{Sb}_2$ - $\text{Mg}_3\text{Bi}_2$ alloy

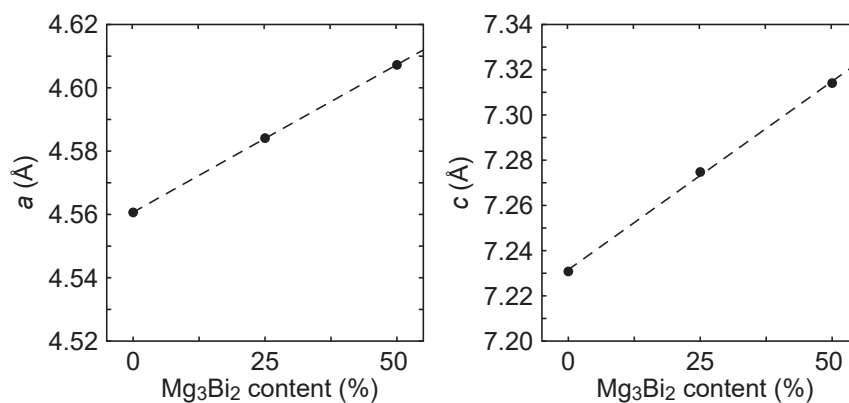

Figure S1: Lattice parameters of  $\text{Mg}_3\text{Sb}_2$ - $\text{Mg}_3\text{Bi}_2$  extracted from X-ray diffraction using  $\text{Cu } K_{\alpha 1}$  radiation on pellet samples. The dashed lines are linear fits, the expected behavior for a solid-solution.
